# Supplementary material for: Technical Note: Low cost stage-camera system for continuous waterlevel monitoring in ephemeral streams
Source: Copernicus journal article supplement (doi:10.5194/hess-2021-36), 2021-02-10
Supplement: Supplementary file [file hess-2021-36-AC4-supplement.pdf]

Hydrol. Earth Syst. Sci. Discuss., author comment AC1  
<https://doi.org/10.5194/hess-2021-36-AC1>, 2021  
© Author(s) 2021. This work is distributed under  
the Creative Commons Attribution 4.0 License.

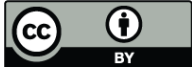

## Authors' reply to CC, RC1, and RC2

Simone Noto et al.

---

Author comment on "Technical Note: Low cost stage-camera system for continuous water level monitoring in ephemeral streams" by Simone Noto et al., Hydrol. Earth Syst. Sci. Discuss., <https://doi.org/10.5194/hess-2021-36-AC1>, 2021

---

### Authors' reply to:

- Community Comment, CC, by Kenneth Chapman;
- Referee Comment 1, RC1, by Nils Kaplan;
- Referee Comment 2, RC2, by Anonymous Referee;

is included as supplement file.

Please also note the supplement to this comment:

<https://hess.copernicus.org/preprints/hess-2021-36/hess-2021-36-AC1-supplement.pdf>
